# Supplementary figures and images for: Transgenic Overexpression of HDAC9 Promotes Adipocyte Hypertrophy, Insulin Resistance and Hepatic Steatosis in Aging Mice
Source: MDPI journal article supplement (doi:10.3390/biom14040494), 2024-04-18

# Original images for blots/gels

Figure 1B

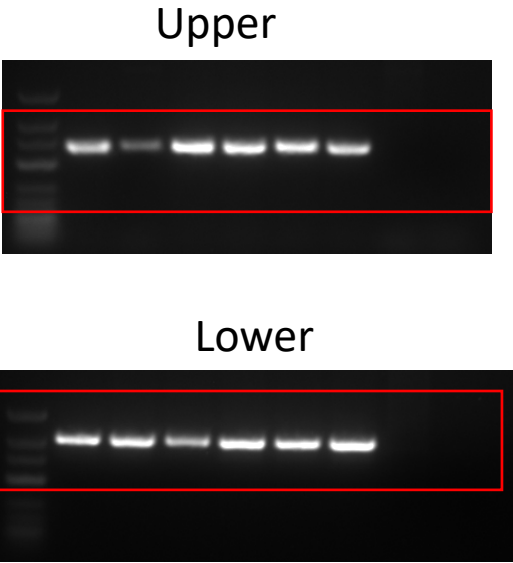

Figure 1E

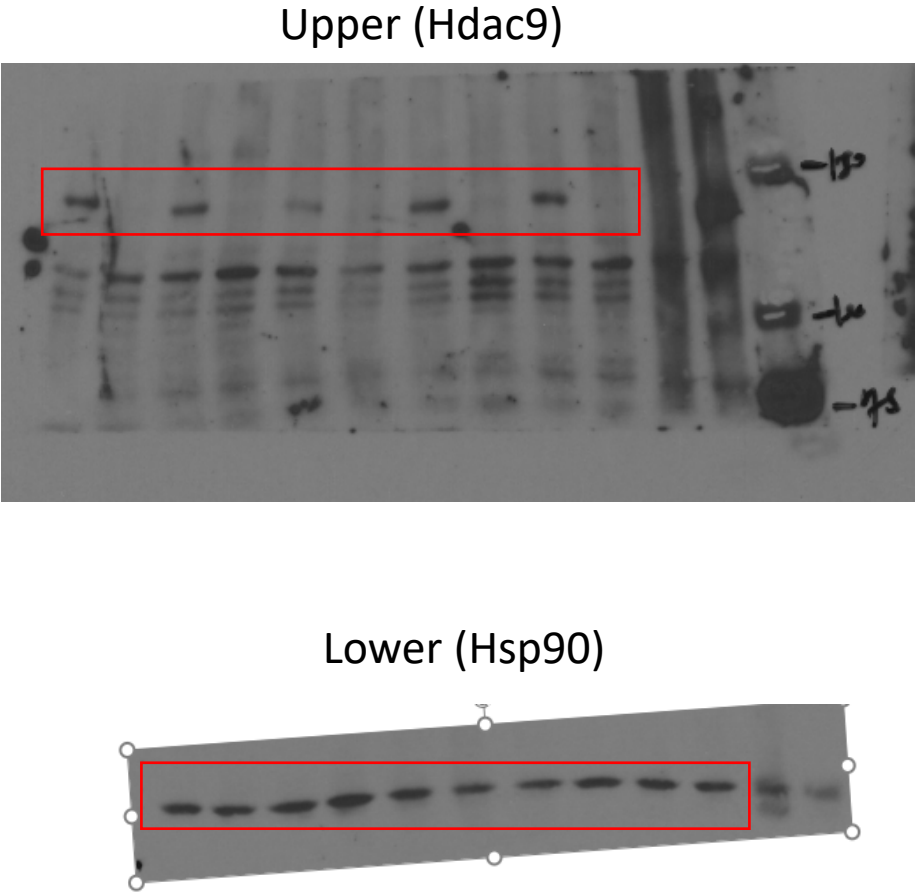

Supplement: s1 [file s1]
